# Supplementary material for: Identification and validation of QTLs for 100-seed weight using chromosome segment substitution lines in soybean
Source: PubMed Central journal article supplement — Breed Sci. 2018 Aug 28;68(4):442–8. doi: 10.1270/jsbbs.17127 (PMC6198907; doi:10.1270/jsbbs.17127), 2018-08-28
Supplement: 68_17127_1.pdf [file 68_17127_1.pdf]

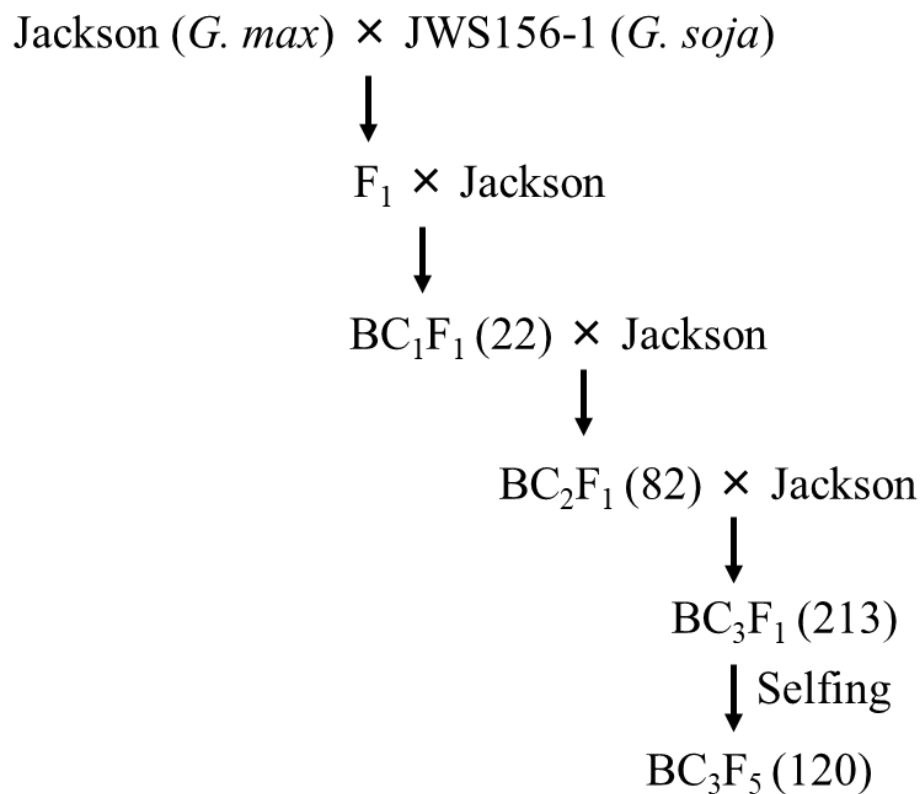

**Supplemental Fig. 1.** Scheme for development of the wild soybean ‘JWS156-1’ chromosome segment substitution lines in the cultivated soybean variety ‘Jackson’ background. The numbers of plants or lines are indicated in parentheses.

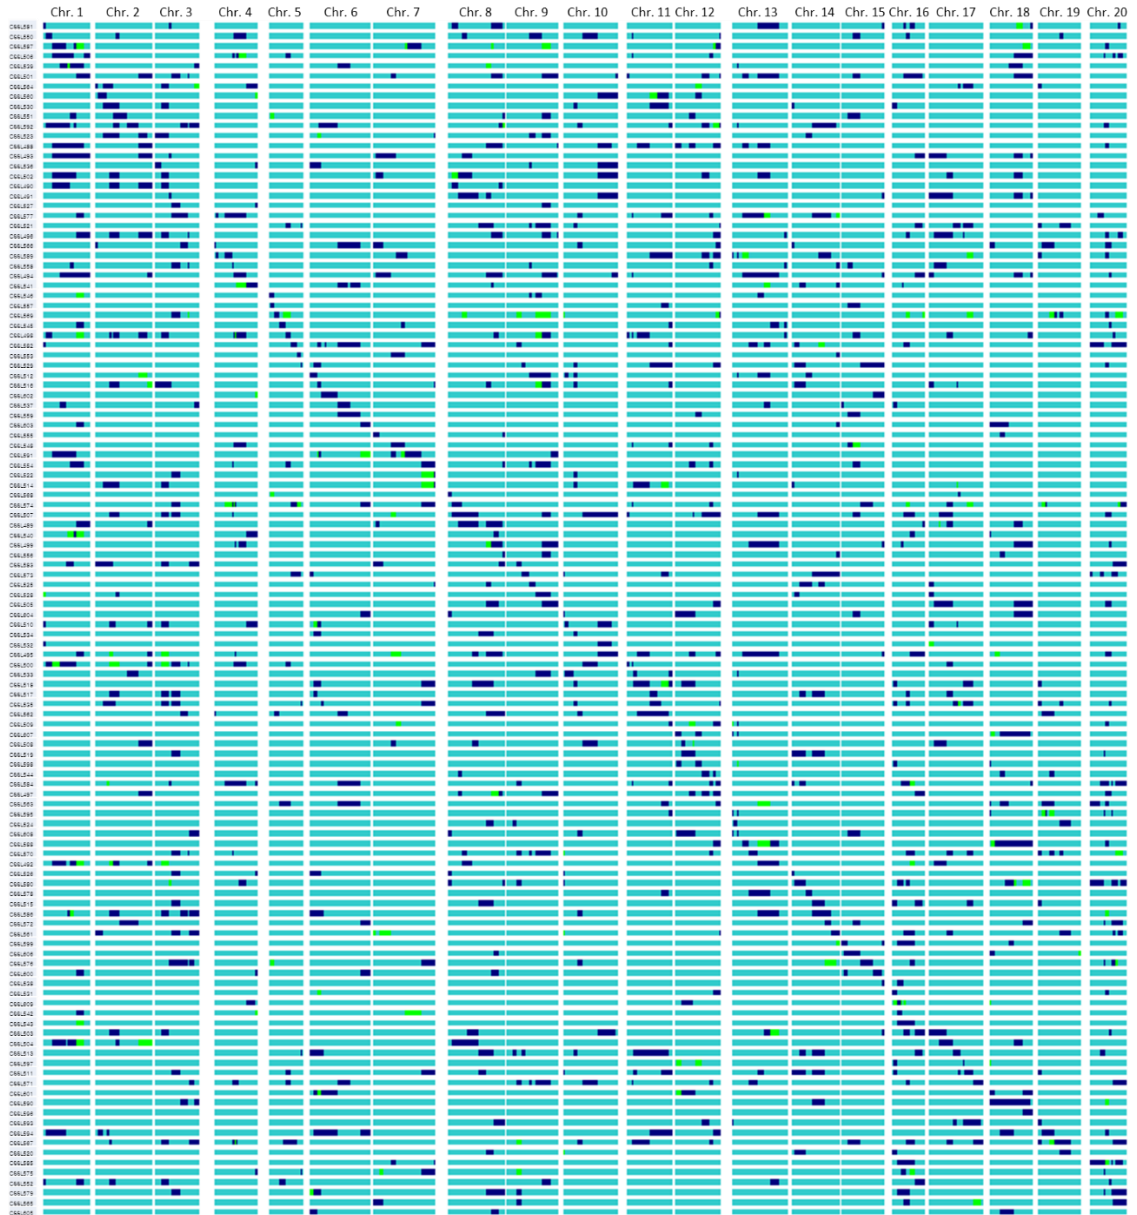

**Supplemental Fig. 2.** Graphical genotypes of the wild soybean ‘JWS156-1’ chromosome segment substitution lines (CSSLs) in the cultivated soybean variety ‘Jackson’ background. Blue, ‘JWS156-1’ homozygous; cyan, ‘Jackson’ homozygous; green, heterozygous.
